# Supplementary material
Source: PubMed Central journal article supplement (PMC4070512)
Supplement: NIHMS545419-supplement-01.pdf [file NIHMS545419-supplement-01.pdf]

# Flavanones from *Miconia prasina*

Amer H. Tarawneh<sup>a</sup>, Francisco León<sup>a</sup>, Mohammed A. Ibrahim<sup>b</sup>, Sara Pettaway<sup>a</sup>, Christopher R. McCurdy<sup>a,b</sup>, Stephen J. Cutler<sup>a,b,\*</sup>

<sup>a</sup> *Department of Medicinal Chemistry*, <sup>b</sup> *National Center for Natural Products Research, School of Pharmacy, The University of Mississippi, University, MS 38677, USA*

## Table of Content

---

|                                                                  | Page |
|------------------------------------------------------------------|------|
| Figure 1S. <sup>1</sup> H NMR spectrum of compound 1.            | 2    |
| Figure 2S. <sup>13</sup> C NMR spectrum of compound 1.           | 3    |
| Figure 3S. <sup>13</sup> C NMR y DEPT experiments of compound 1. | 4    |
| Figure 4S COSY experiment of compound 1.                         | 5    |
| Figure 5S. HSQC experiment compound 1.                           | 6    |
| Figure 6S. HMBC experiment of compounds 1.                       | 7    |
| Figure 7S. HR-ESIMS of compound 1.                               | 8    |
| Figure 8S. CD Experiment of compound 1.                          | 9    |

---

\*To whom correspondence should be addressed. Phone: 1-662-915-7101; Fax: 1-662-915-5638.  
E-mail: cutler@olemiss.edu

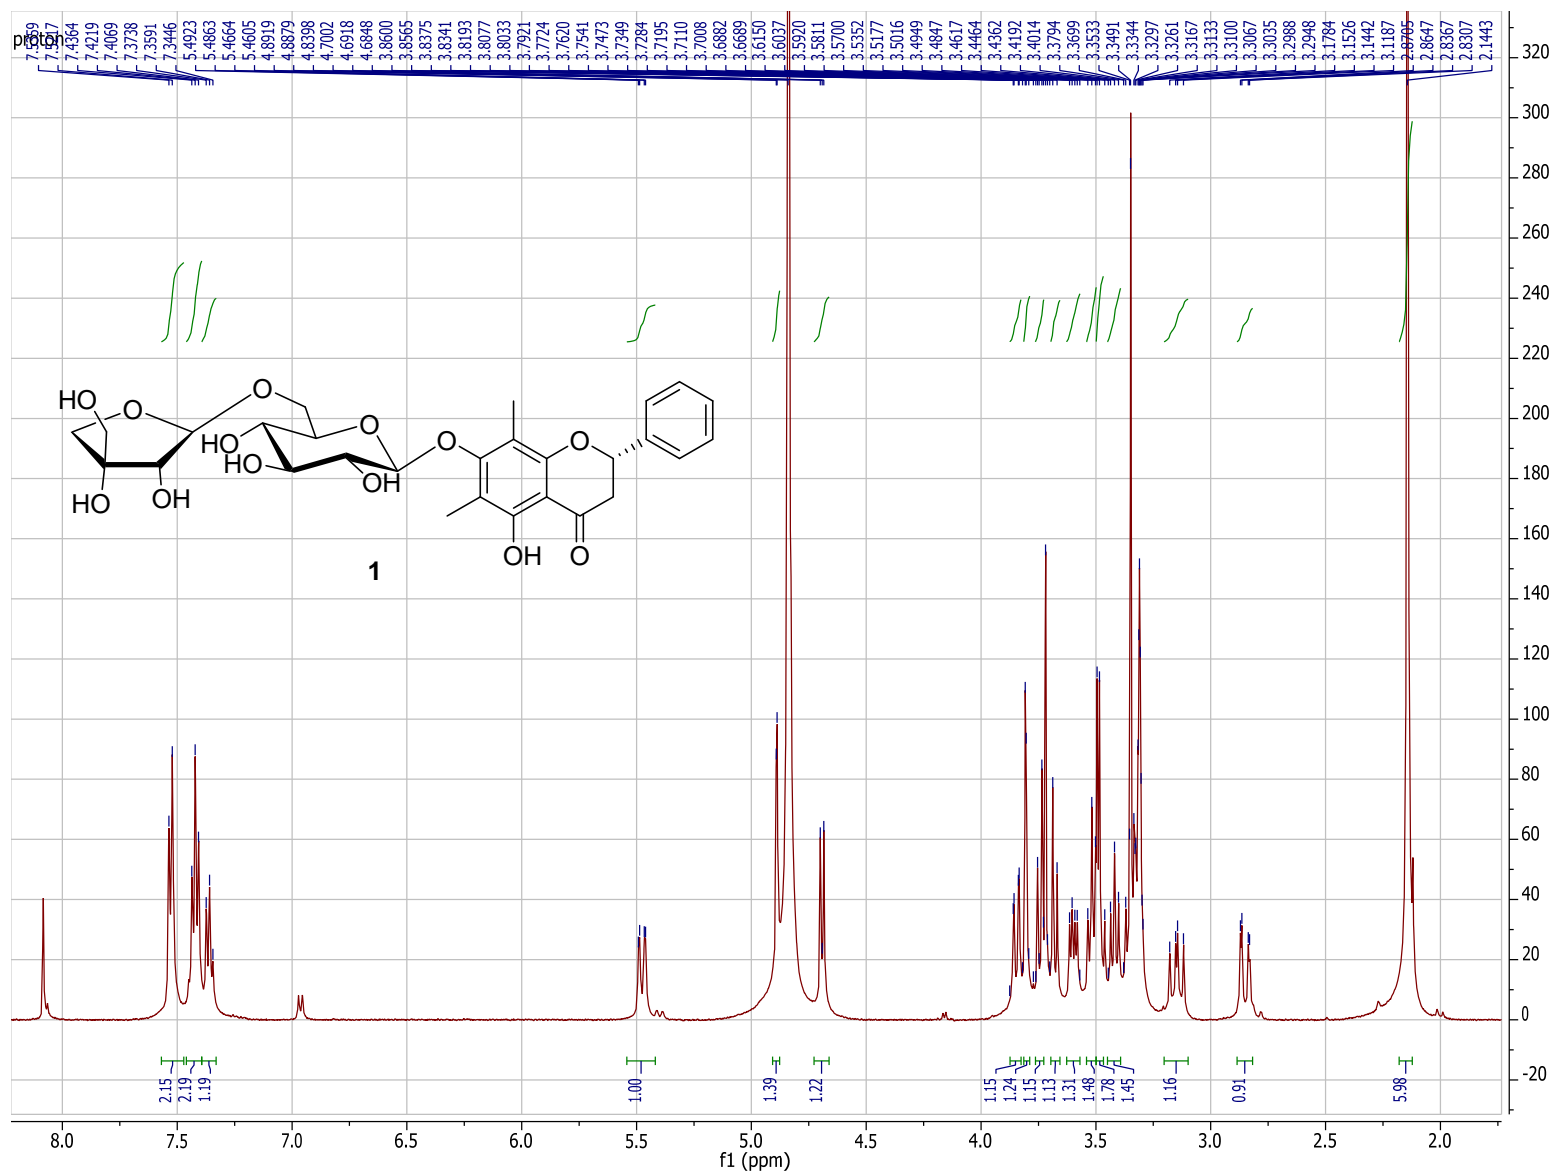

Fig. 1S  $^1\text{H}$  NMR of compound 1.

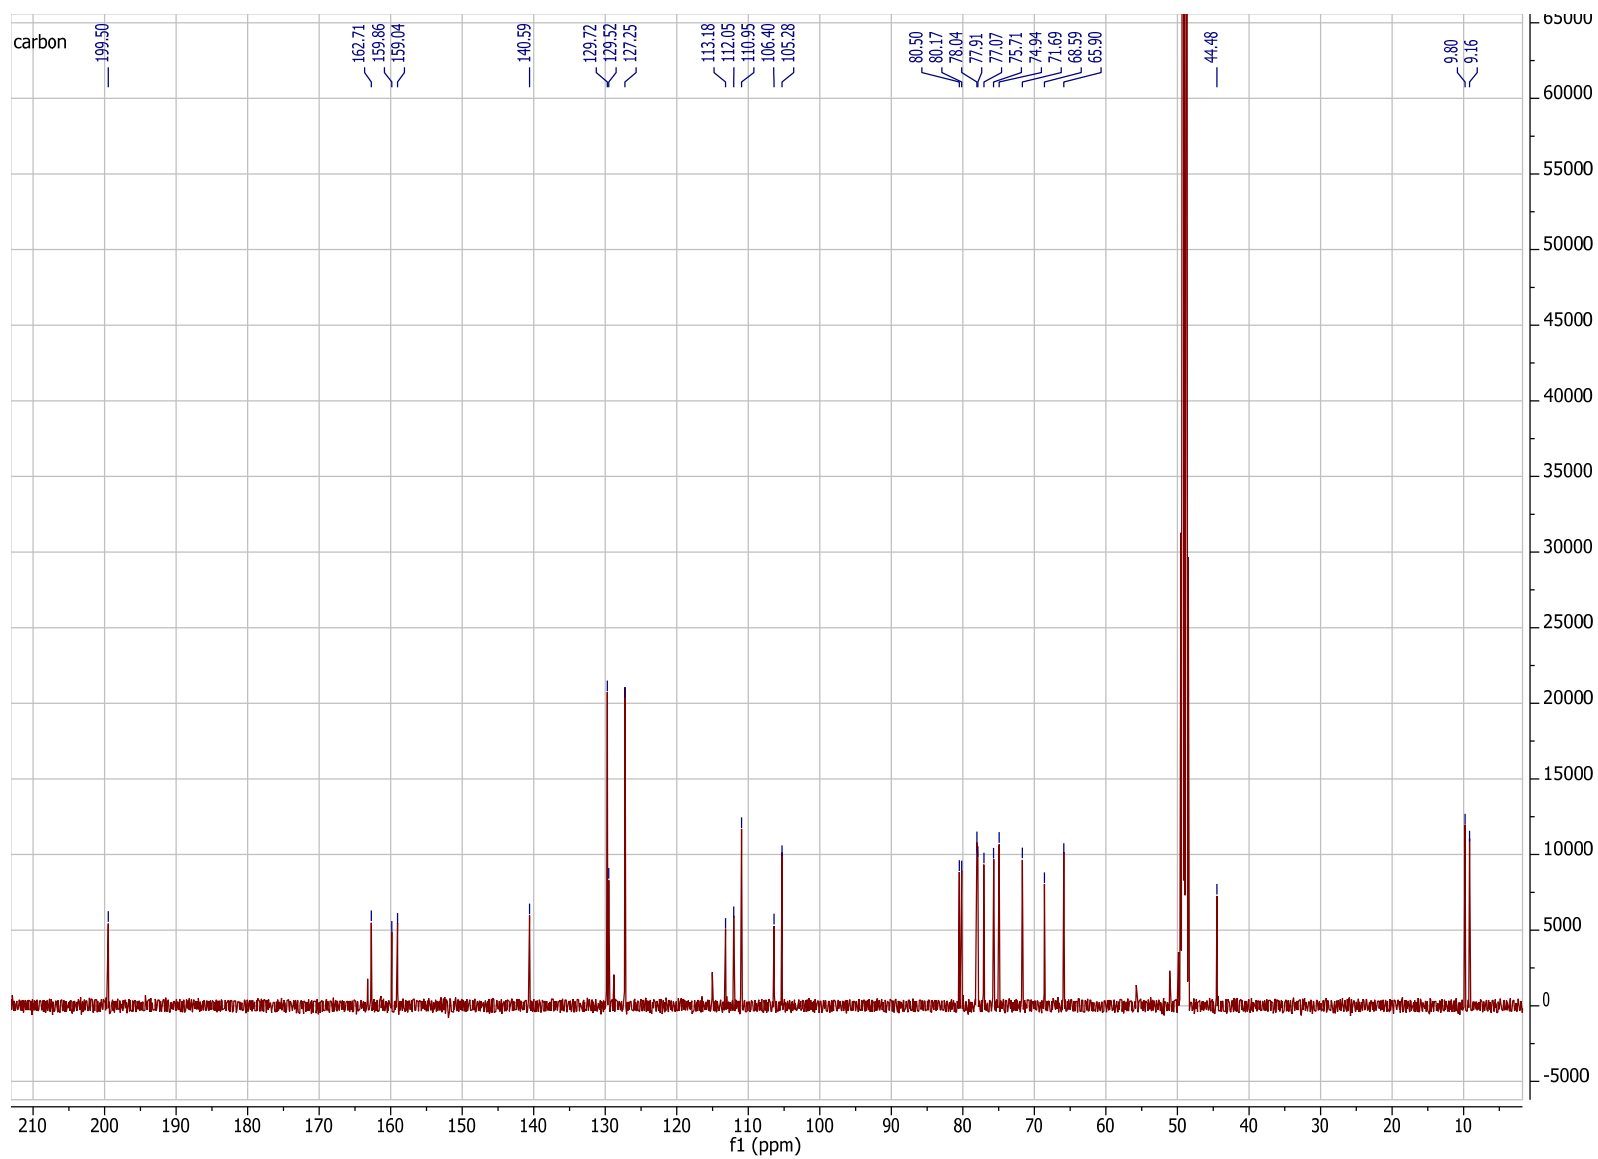

**Fig. 2S**  $^{13}\text{C}$  NMR of compound **1**.

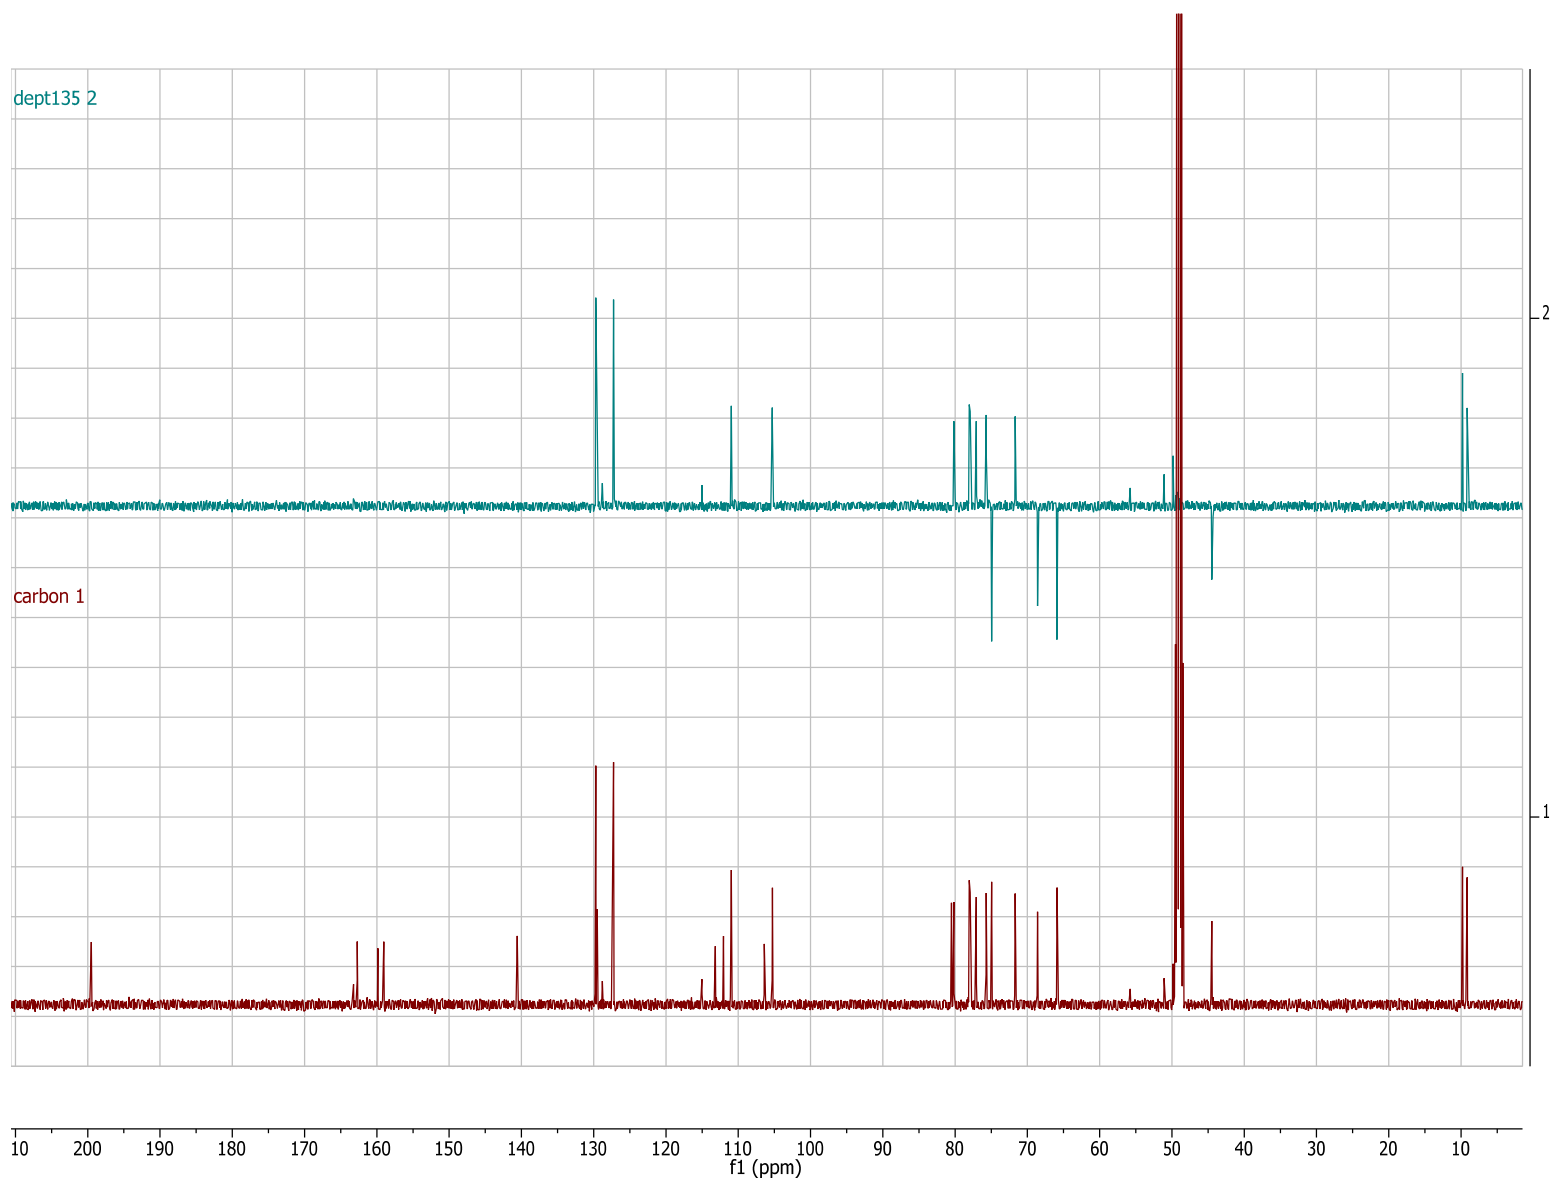

Figure 3S. <sup>13</sup>C NMR y DEPT experiments of compound 1.

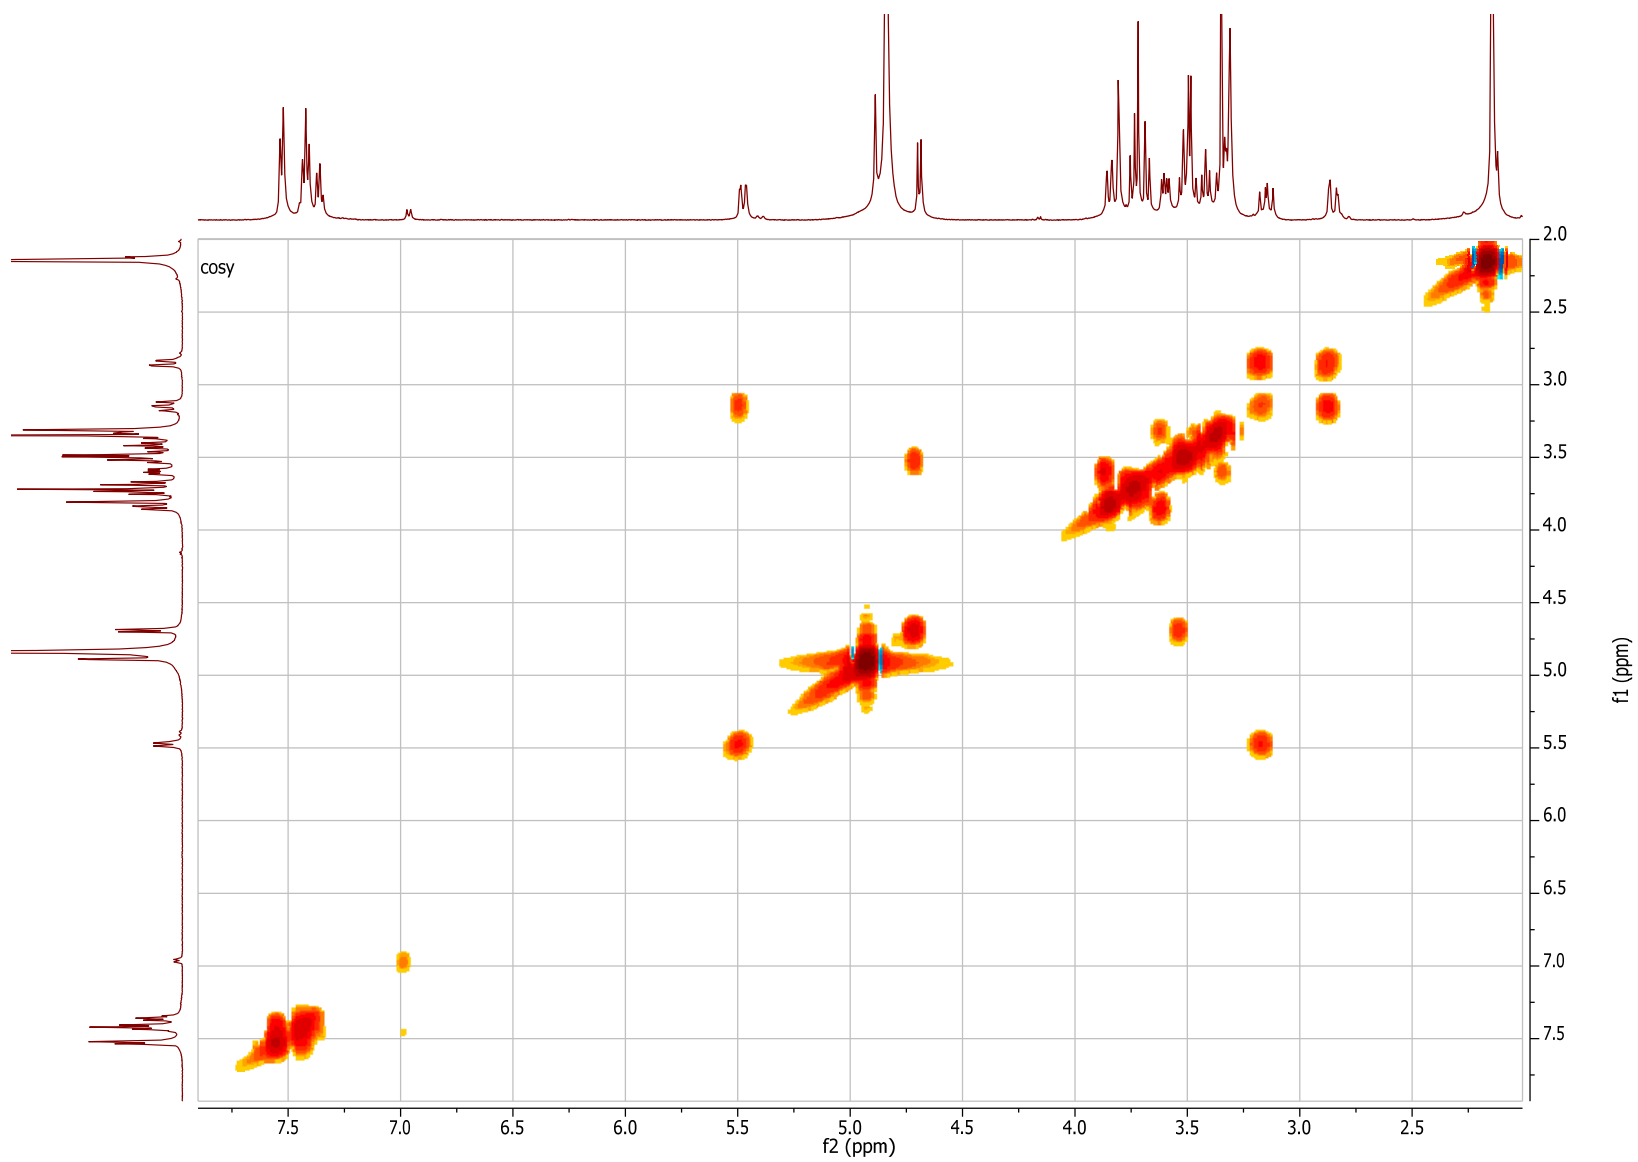

**Fig. 4S** COSY experiment of compound **1**.

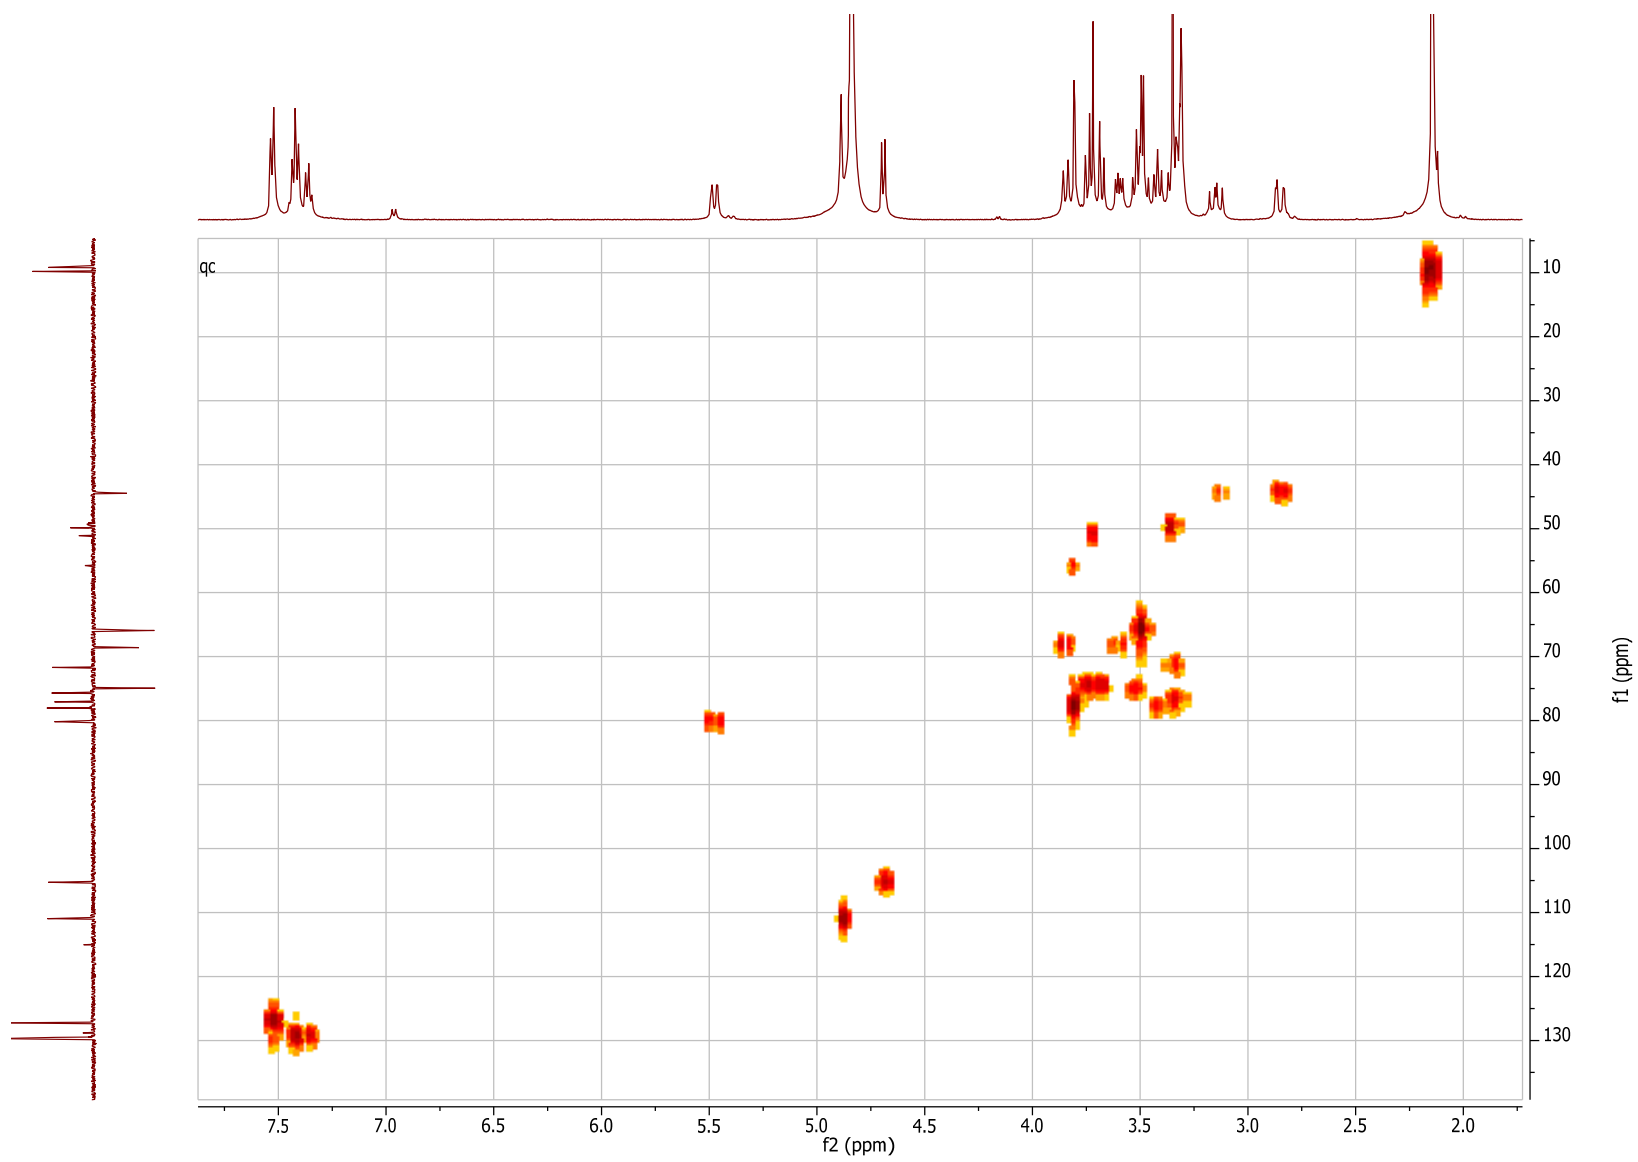

**Fig. 5S.** HSQC experiment of compound **1**.

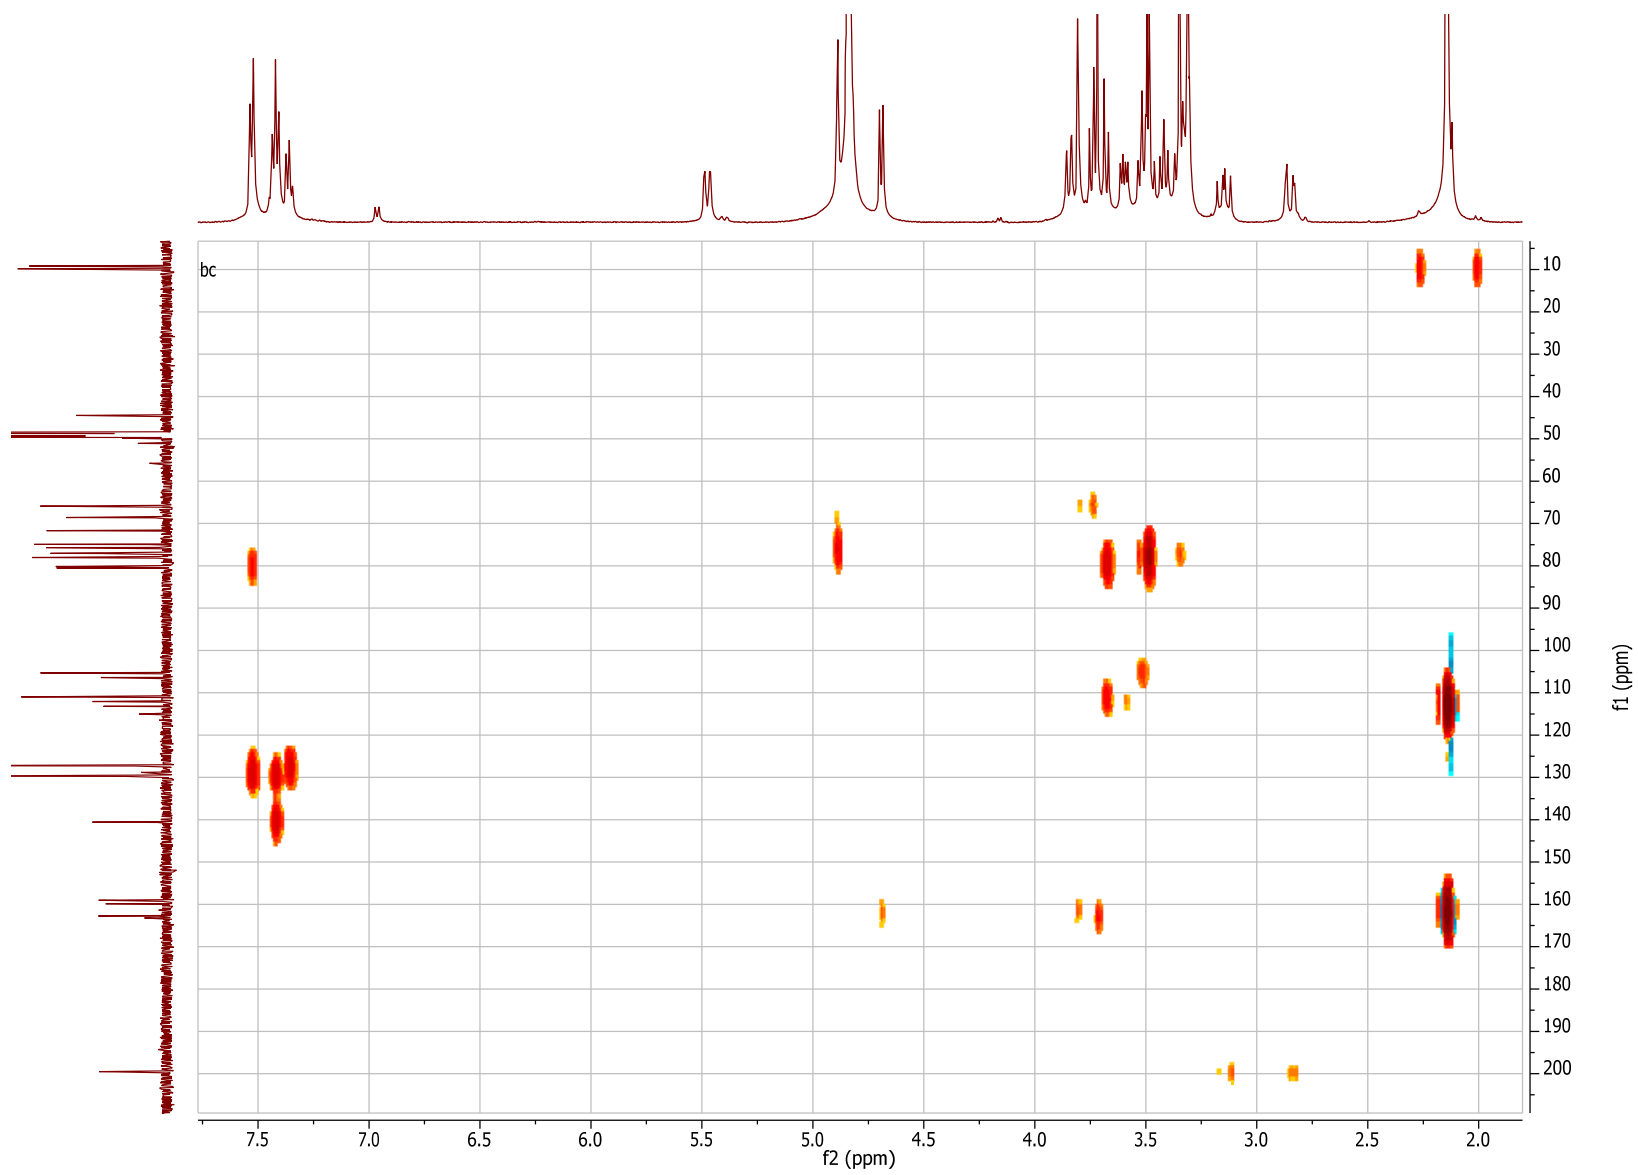

**Fig. 6S.** HMBC experiment of compound 1.

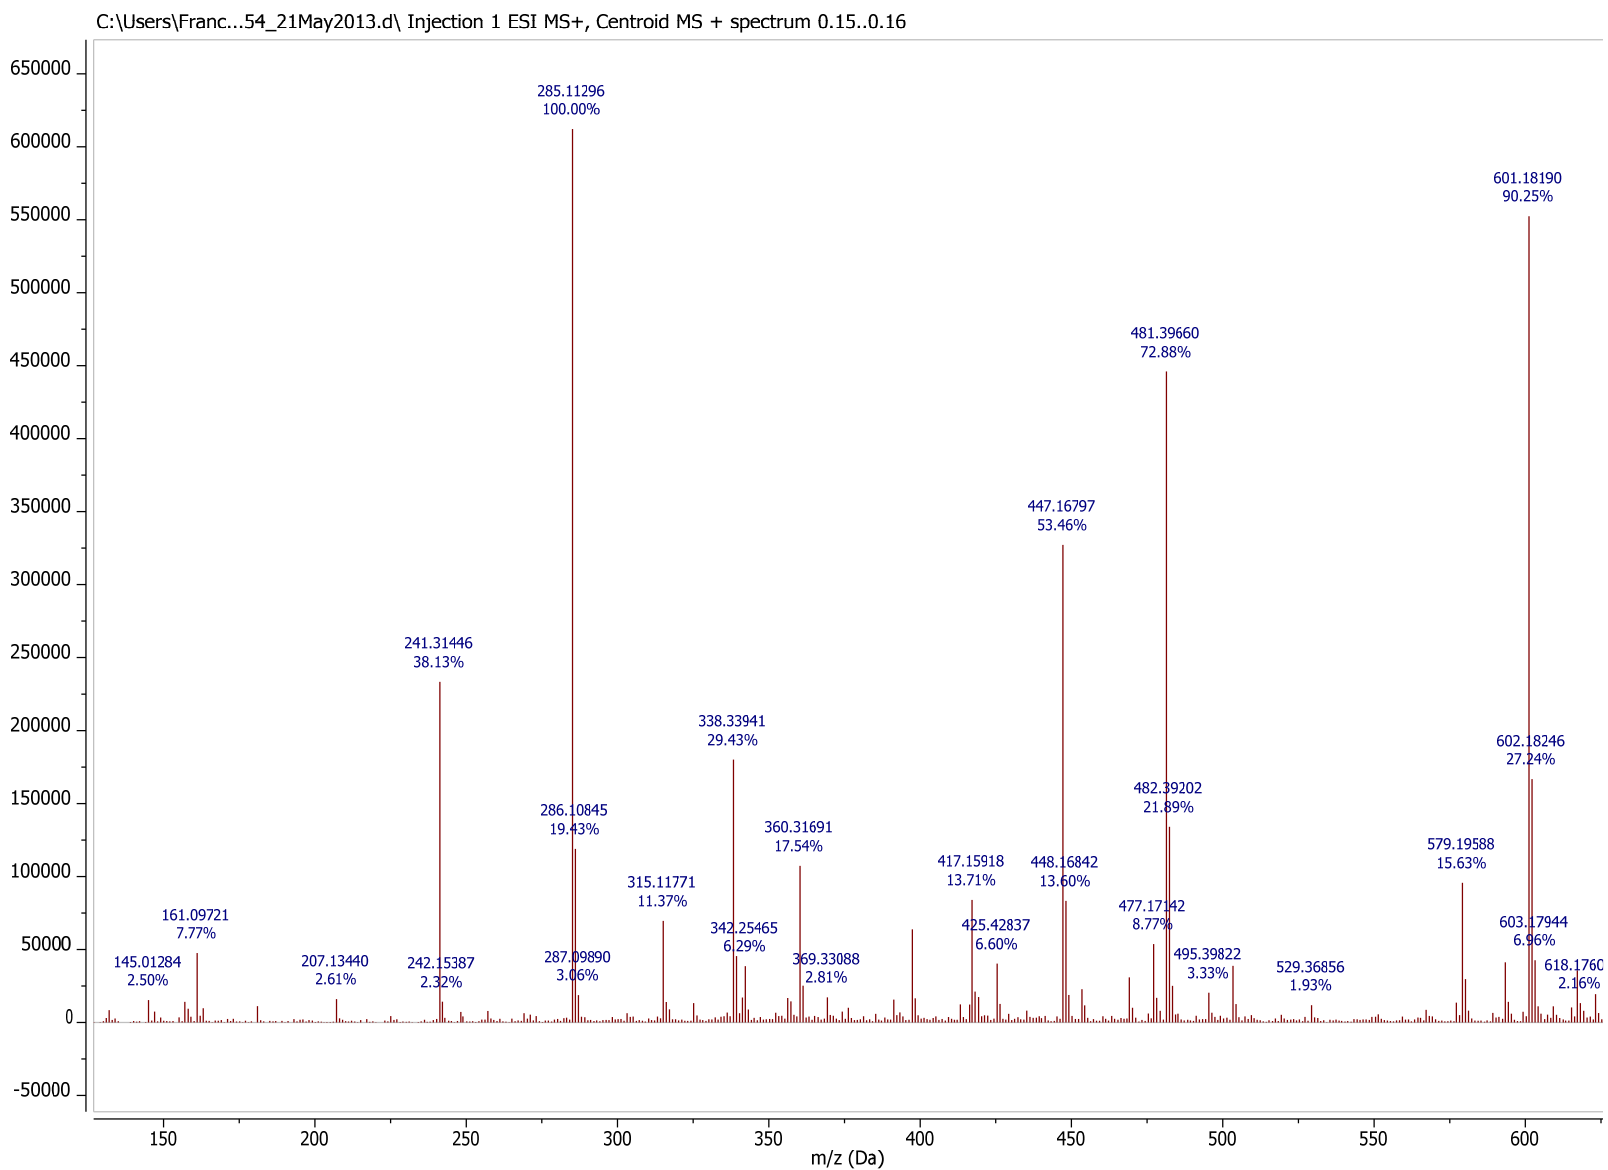

**Fig. 7S.** HR-ESIMS of compound **1**.



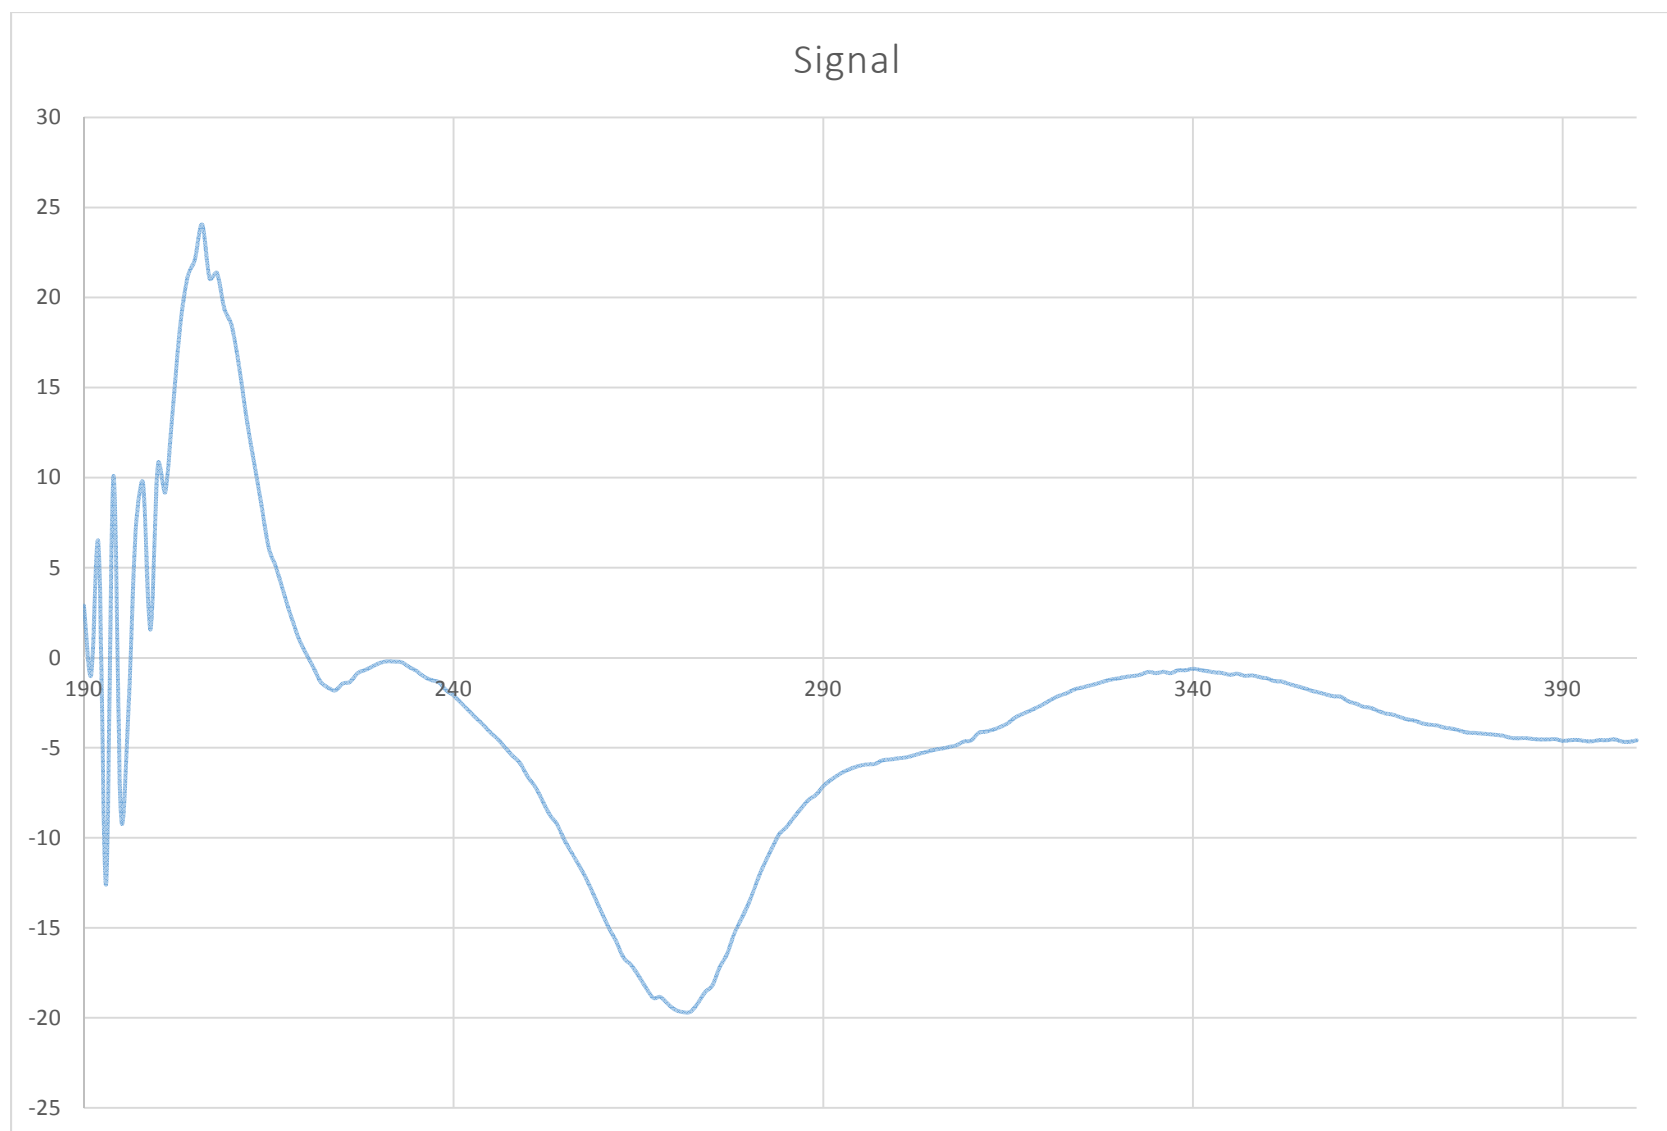

**Fig. 8S** CD Experiment of compound 1.
